# Supplementary material for: Rapid extraction of trace bisphenol A in real water samples using hollow mesoporous silica surface dummy molecularly imprinted polymers
Source: Royal Society of Chemistry journal article supplement (doi:10.1039/c8ay01530a), 2018-01-01
Supplement: c8ay01530a1.pdf [file c8ay01530a1.pdf]

## Electronic Supplementary Information

# **Rapid extraction of trace bisphenol A in real water samples using hollow mesoporous silica surface dummy molecularly imprinted polymers**

*Leyan Li, Kai Yu, Mengjie Tian, Yafei Wang, Zulei Zhang\*, Guangyuan Jiang, Lei Li\**

School of Biology and Chemical Engineering, Jiaying University, Jiaying 314001,  
China

\*Corresponding author

Email: jerry3641172@126.com, lei.li@mail.zjxu.edu.cn

Fax: +86-573-83646203; Tel: +86-573-83646203

### **1. Equations**

The pseudo-first-order rate equation is listed as follows:

$$\ln(Q_e - Q_t) = \ln Q_e - k_1 t \quad (1)$$

where  $Q_e$  and  $Q_t$  (mg/g) are the amount of BPA adsorbed on HM-DMIPs at equilibrium and time  $t$ , respectively.  $k_1$  ( $\text{cm}^{-1}$ ) is the rate constant of pseudo-first-order model.

The pseudo-second-order rate equation is listed as follows:

$$\frac{t}{Q_t} = \frac{1}{k_2 Q_e^2} + \left(\frac{1}{Q_e}\right)t \quad (2)$$

where  $k_2$  is the rate constant of pseudo-second-order model.

## 2. Supporting data

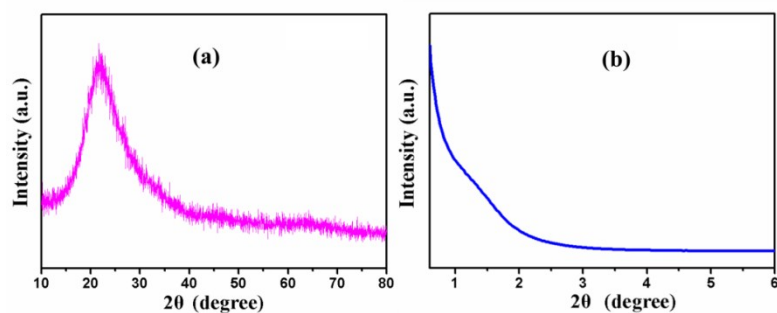

Fig.S1 Wide-angle (a) and low-angle (b) XRD spectra of HM-DMIPs

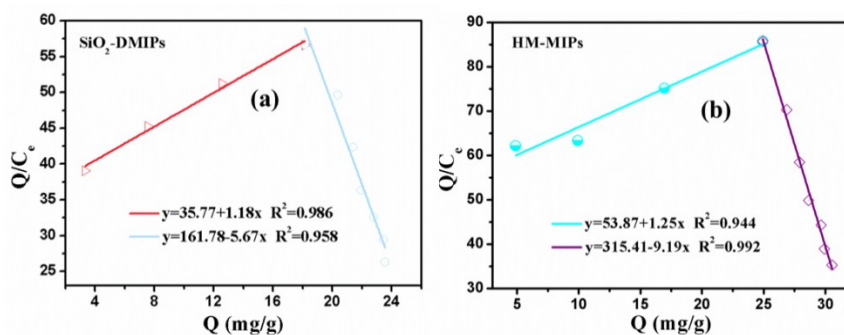

Fig.S2 Scatchard plots of SiO<sub>2</sub>-DMIPs (a) and HM-MIPs (b)

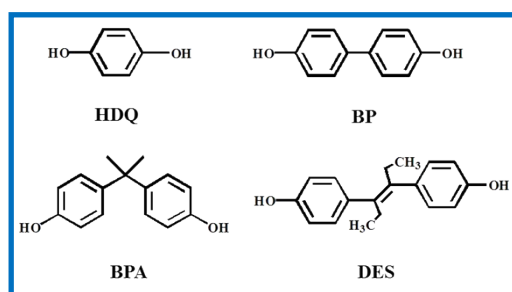

Fig.S3 Molecular structure of analogs used in this work

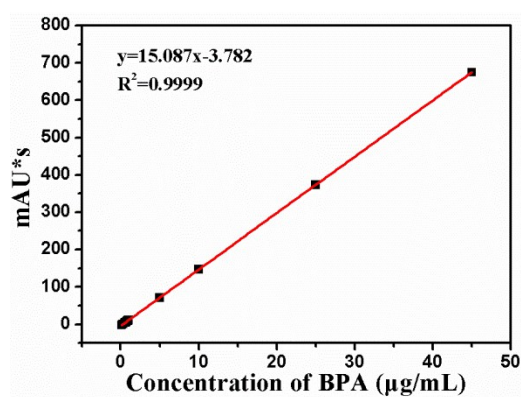

Fig.S4 Calibration curve for the determination of BPA by HPLC/UV
